# Supplementary material for: Rapid Charging of Thermal Energy Storage Materials through Plasmonic Heating
Source: PubMed Central journal article supplement — Sci Rep. 2014 Sep 1;4:6246. doi: 10.1038/srep06246 (PMC4150109; doi:10.1038/srep06246), 2014-09-01
Supplement: srep06246-s1.pdf [file srep06246-s1.pdf]

## Supplementary Information

### Rapid Charging of Thermal Energy Storage Materials through Plasmonic Heating

Zhongyong Wang,<sup>a, †</sup> Peng Tao,<sup>a, †</sup> Yang Liu,<sup>a</sup> Hao Xu,<sup>a</sup> Qinxian Ye,<sup>a</sup> Hang Hu,<sup>a</sup> Chengyi Song,<sup>a</sup> Zhaoping Chen,<sup>b</sup> Wen Shang<sup>a,\*</sup>, Tao Deng<sup>a,\*</sup>

a. State Key Laboratory of Metal Matrix Composites, School of Materials Science and Engineering, Shanghai Jiao Tong University, Shanghai, 200240, P. R. China.

b. Research Institute, Baoshan Iron & Steel Co. Ltd, Shanghai, 201900, P. R. China.

\*Correspondence and requests for materials should be addressed to W. S. ([shangwen@sjtu.edu.cn](mailto:shangwen@sjtu.edu.cn)) or T. D. ([dengtao@sjtu.edu.cn](mailto:dengtao@sjtu.edu.cn)).

<sup>†</sup>Zhongyong Wang and Peng Tao equally contributed to this work.

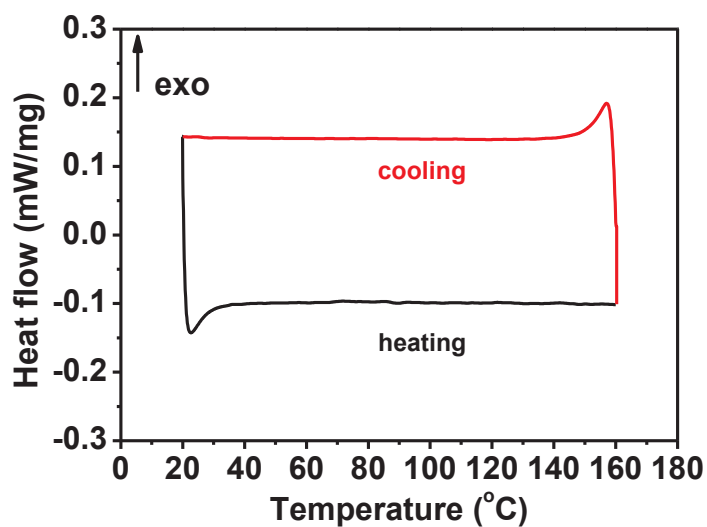

**Figure S1.** DSC curve of neat gel wax.

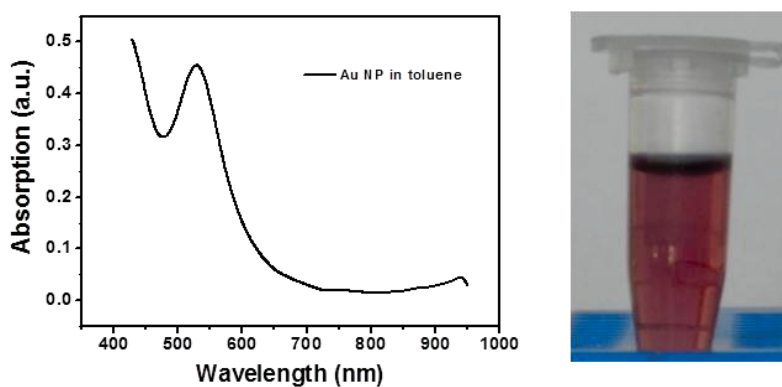

**Figure S2.** Absorption spectrum of Au NPs in toluene (left) and an photograph of transparent red dispersion (right).

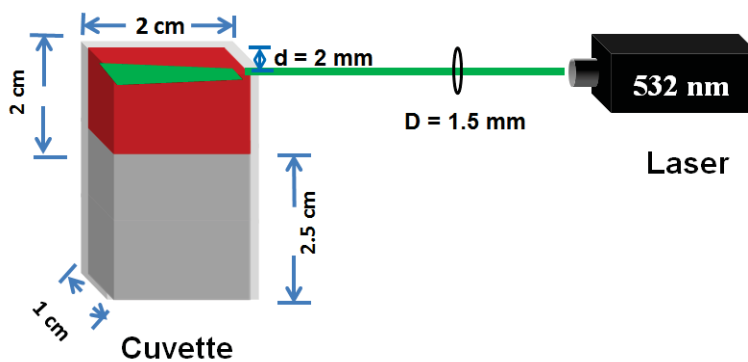

**Figure S3.** Specific dimensions of laser illumination experimental setup.

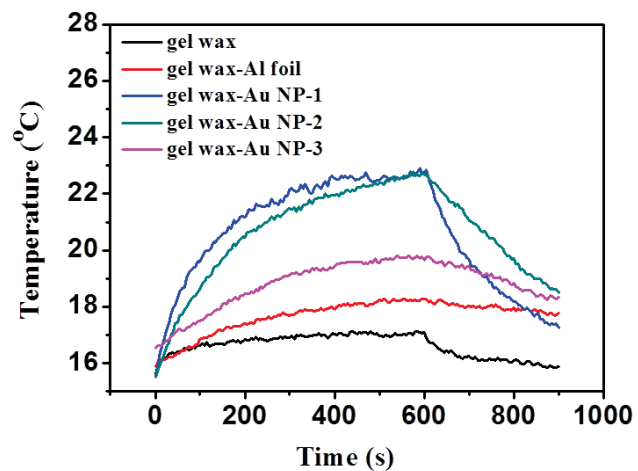

**Figure S4.** Temperature profile of thermal storage materials at the exit side of cuvette under laser illumination.

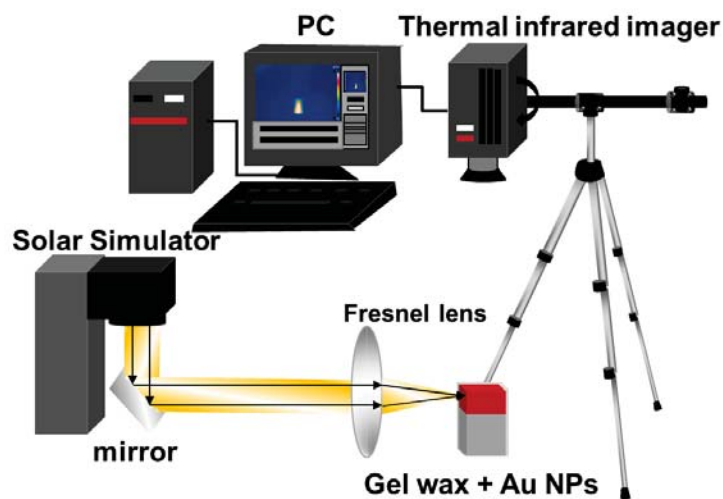

**Figure S5.** Schematic illustration of solar illumination experimental set up. The simulated sunlight was focused to a spot with a diameter of 1 cm by a PMMA Fresnel lens onto the thermal storage material sample.

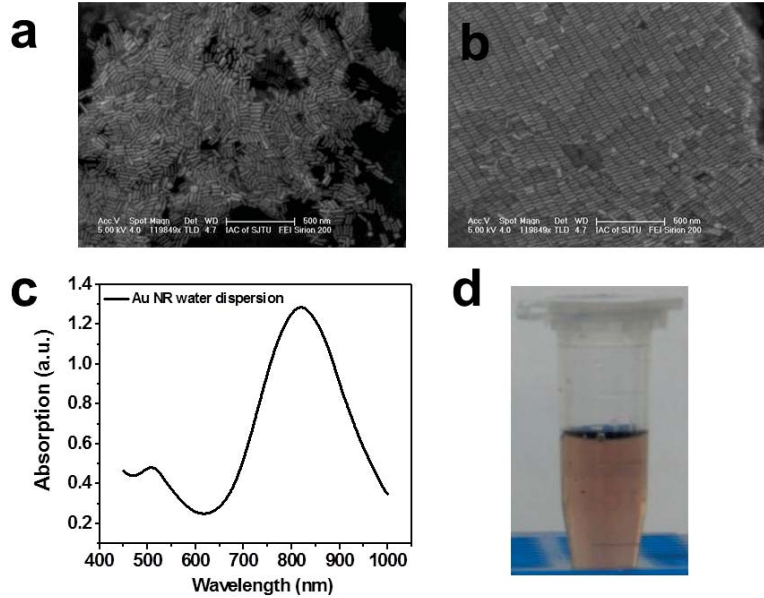

**Figure S6.** (a, b) SEM image of the as-synthesized Au NRs deposited on a Si wafer; (c) Absorption spectrum of Au NRs dispersion in water; (d) A photograph of Au NRs dispersion in water.

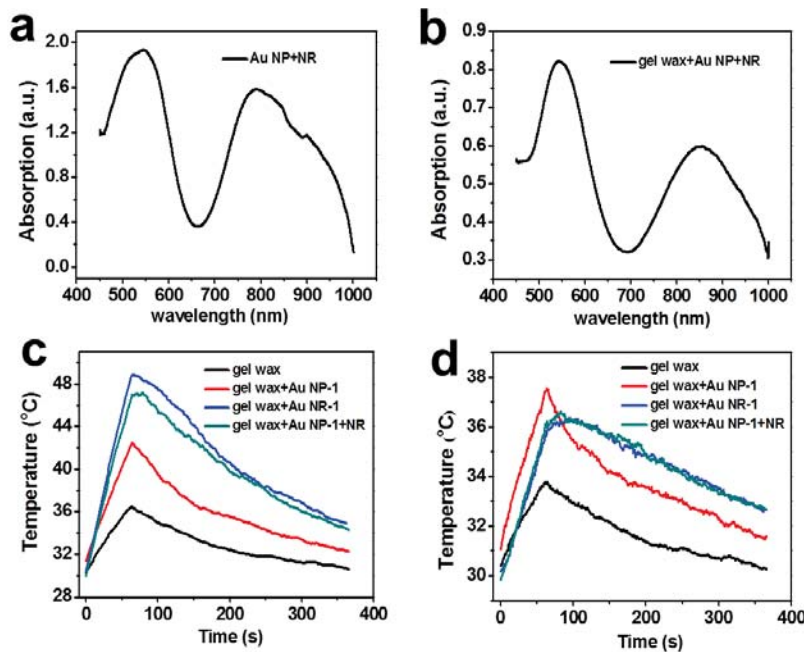

**Figure S7.** (a) Absorption spectrum of mixed Au NPs and NRs (at a weight ratio of 1:0.37) within chloroform; (b) Absorption spectrum of mixed Au NPs and NRs dispersed within gel wax; (c) Average temperature profile of neat gel wax, gel wax-Au NP-1, gel wax-Au NR-1 and gel wax filled with mixed Au NPs and NRs under  $2.9 \text{ W/cm}^2$  solar illumination; (d) Temperature profile at the exit side of the cuvette.

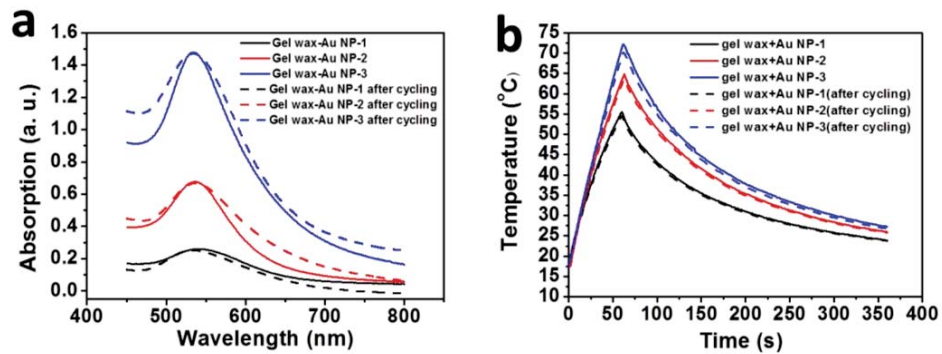

**Figure S8.** Stability test of the prepared plasmonic nanocomposites with repeated heating/cooling for 10 cycles. (a) UV-Vis absorption spectra; (b) Average temperature profile under  $7.2 \text{ W/cm}^2$  sunlight illumination.
